# Supplementary material for: Bioactive doped metals: high synergism in the bactericidal activity of chlorhexidine@silver towards wound pathogenic bacteria
Source: Royal Society of Chemistry journal article supplement (doi:10.1039/c3ra41196f), 2013-01-01
Supplement: c3ra41196f.pdf [file c3ra41196f.pdf]

## Bioactive doped metals: high synergism in the bactericidal activity of chlorhexidine@silver towards wound pathogenic bacteria

Racheli Ben-Knaz<sup>1</sup>, Rami Pedahzur<sup>2</sup> and David Avnir<sup>1</sup>

<sup>1</sup>Institute of Chemistry and the Center for Nanoscience and Nanotechnology, the Hebrew University of Jerusalem, Jerusalem 91904, Israel

<sup>2</sup>Department of Environmental Health, Hadassah Academic College, Jerusalem 91010, Israel

### Supplementary material

#### Supplementary result

Determining the counter ions - supporting TGA measurements

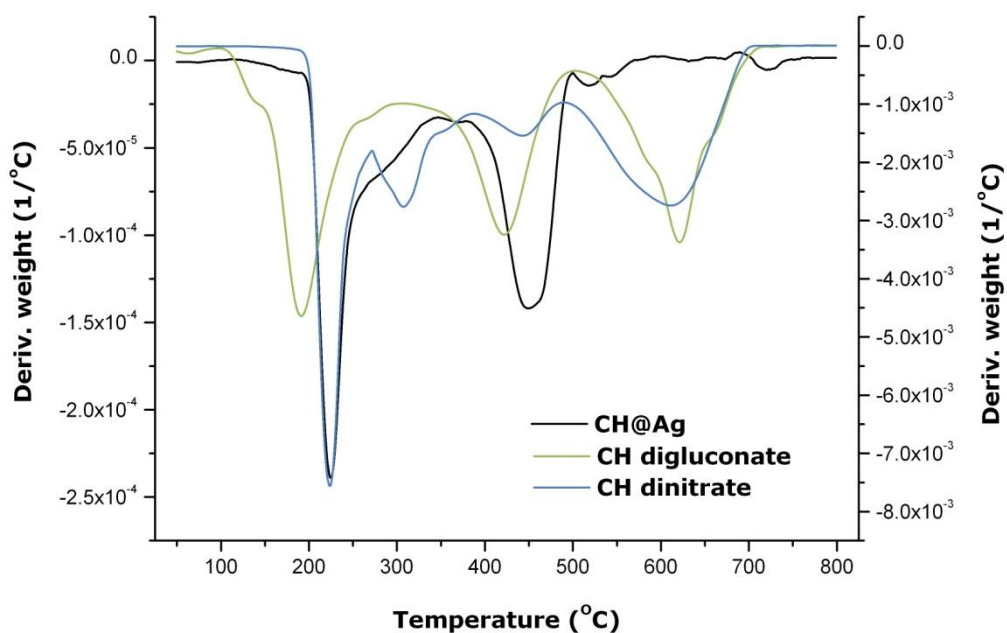

Figure S1: First derivative of the oxidative TGA of CH@Ag (left axis) compared to that of CH dinitrate and that of CH digluconate (right axis)
